# Supplementary material for: Discovery of genes that modulate flavivirus replication in an interferon-dependent manner
Source: bioRxiv or medRxiv preprint supplement (doi:10.1101/2021.07.20.453077), 2021-08-11

Figure S1

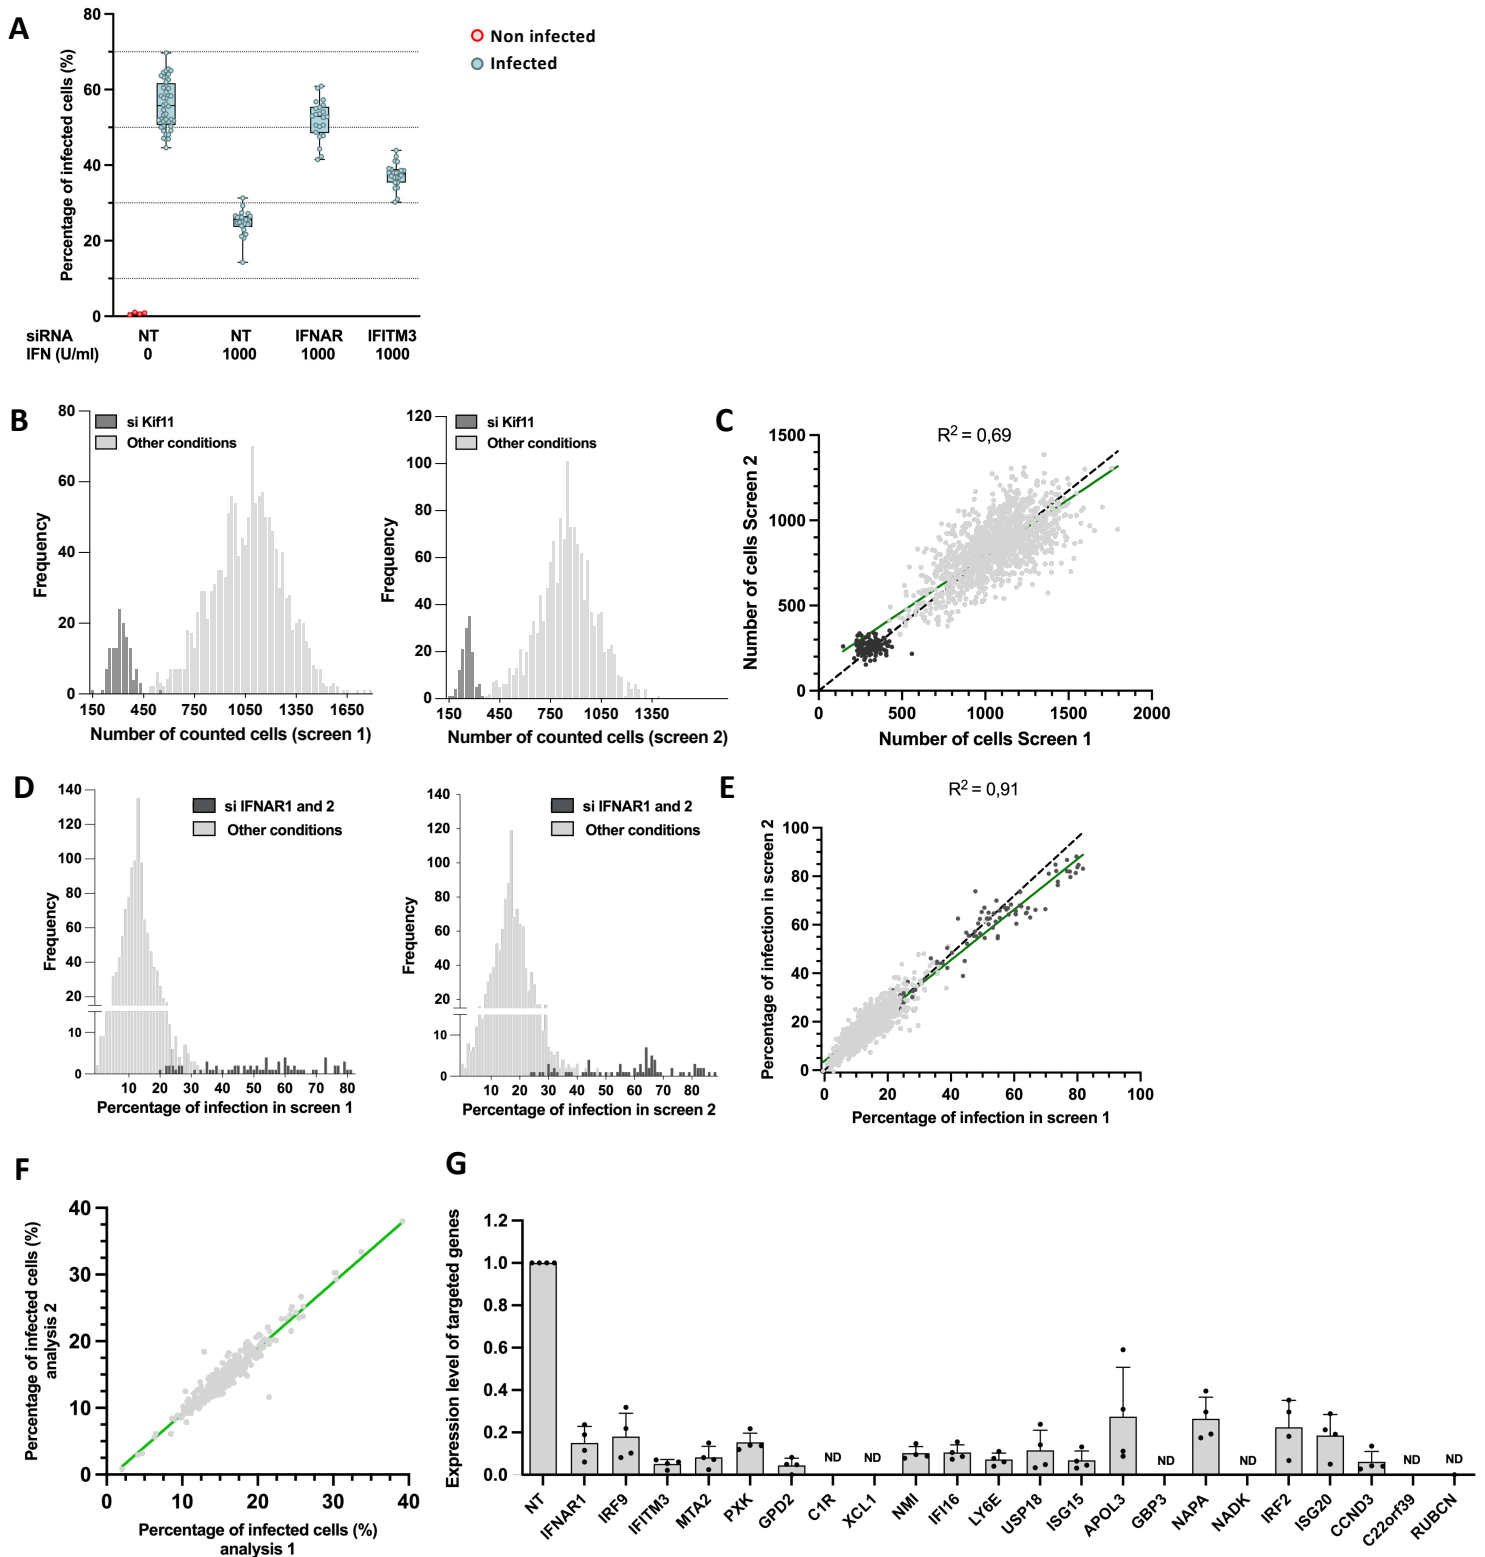

Figure S2

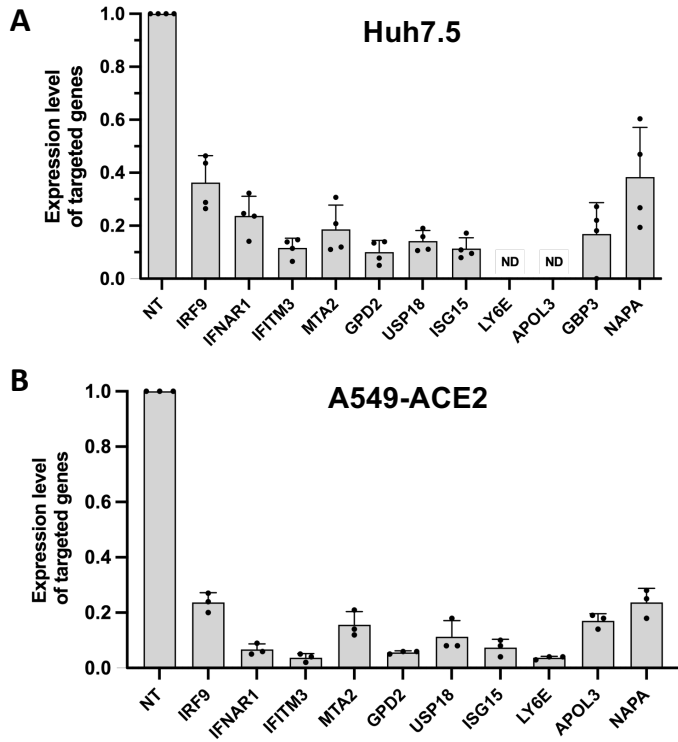

Figure S3

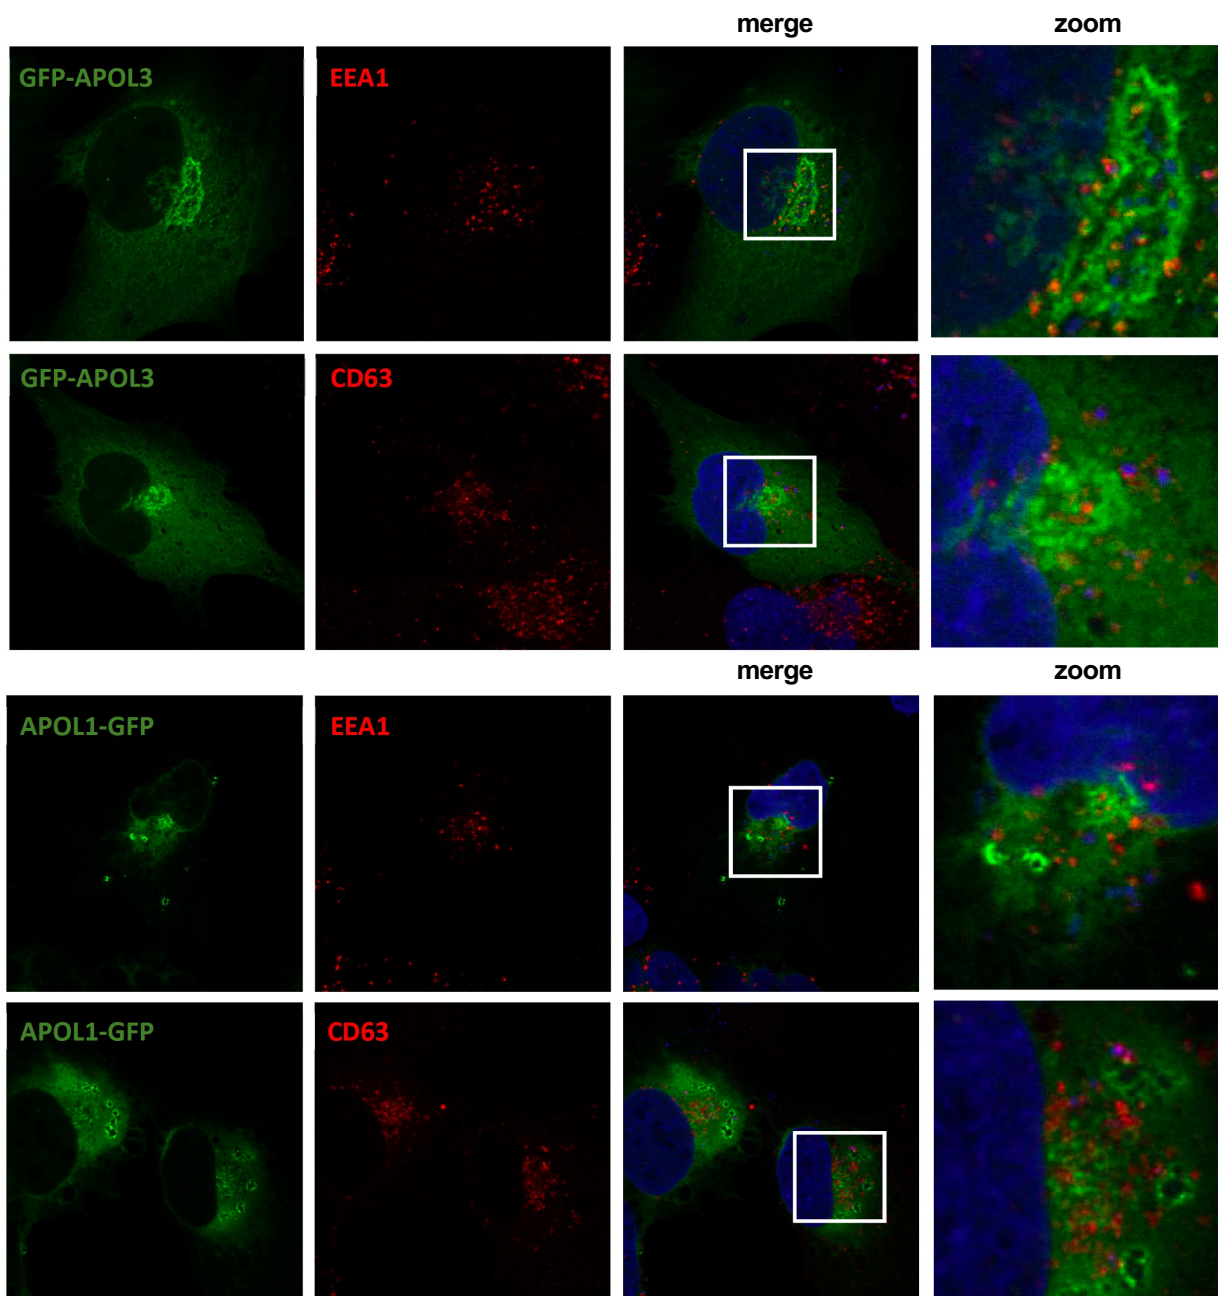

Supplement: Supplementary file [file media-1.pdf]
